# Supplementary material for: Transmembrane protein western blotting: Impact of sample preparation on detection of SLC11A2 (DMT1) and SLC40A1 (ferroportin)
Source: PubMed Central journal article supplement (PMC7347119; doi:10.1371/journal.pone.0235563), 2020-07-09

Fig. 1A

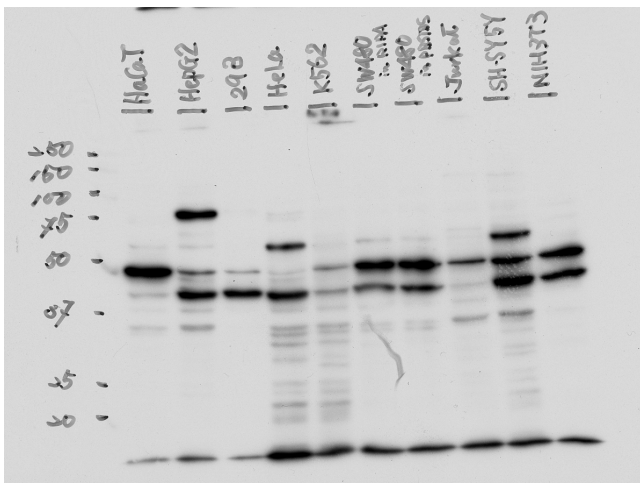

Fig. 1B top

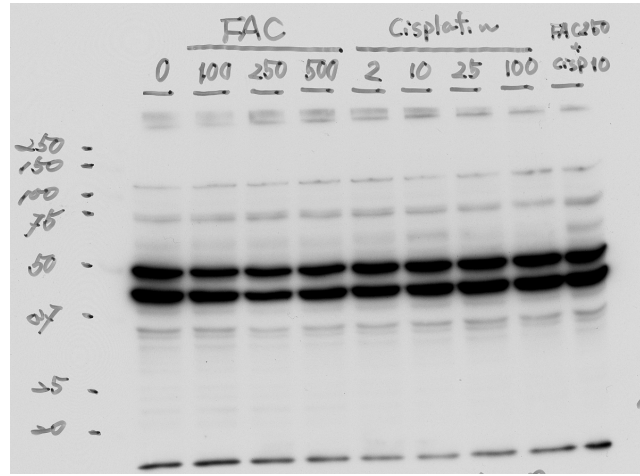

Fig. 1B bottom

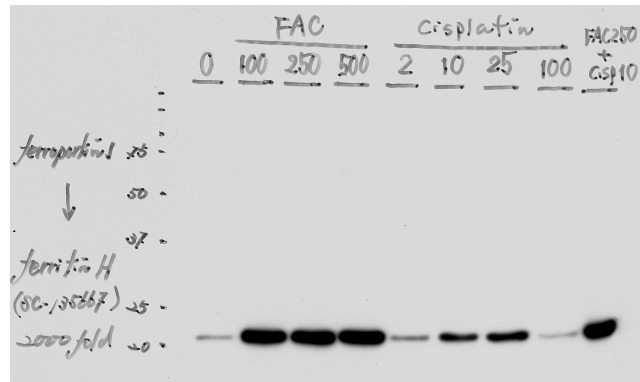

Fig. 2A

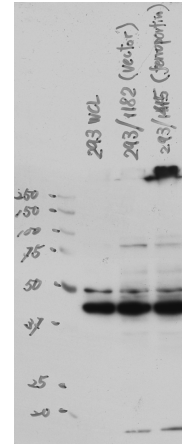

Fig. 2B

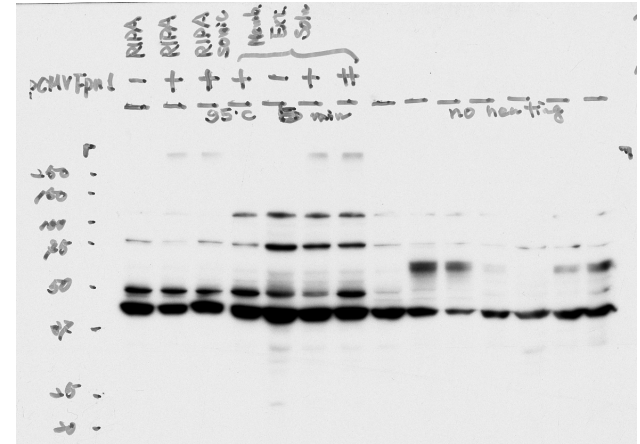

Fig. 2C

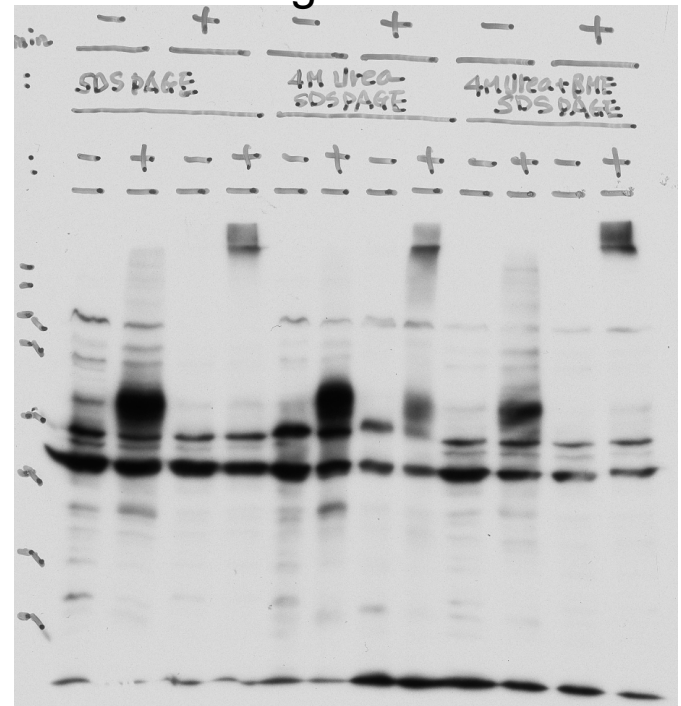

Fig. 3A

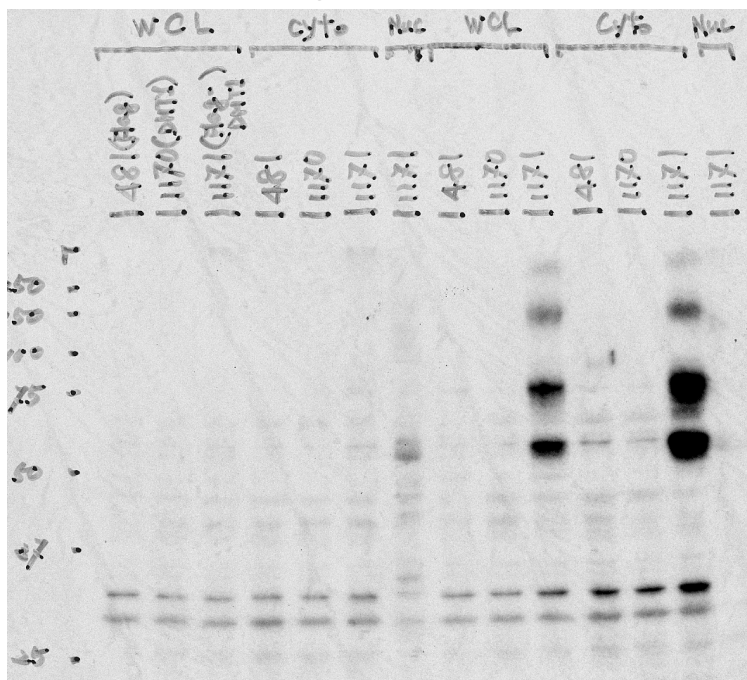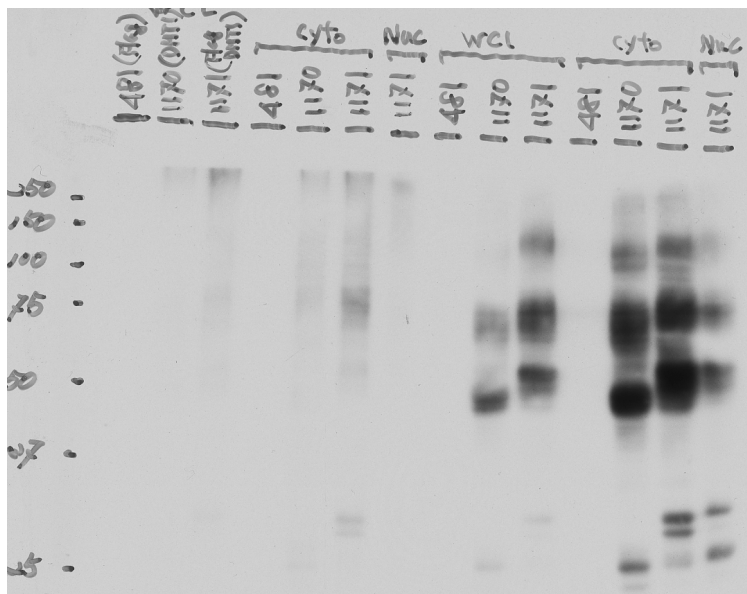

Fig. 3B

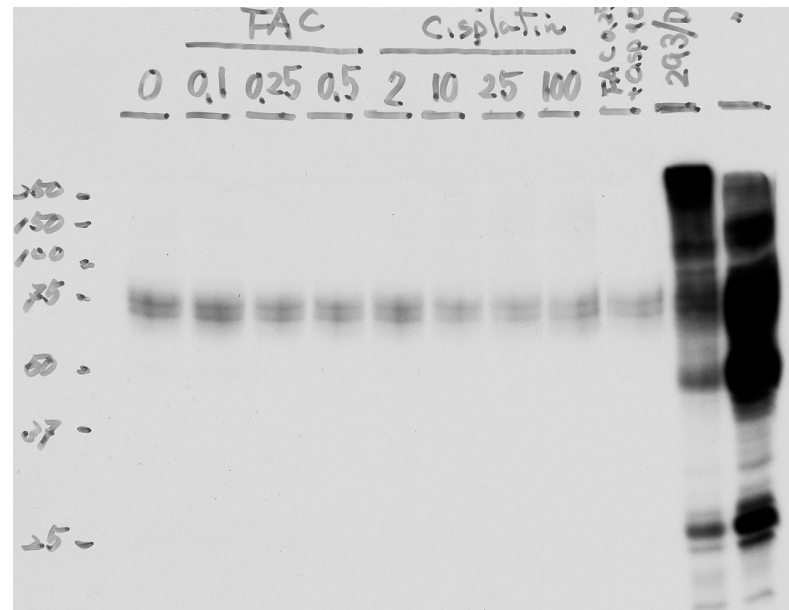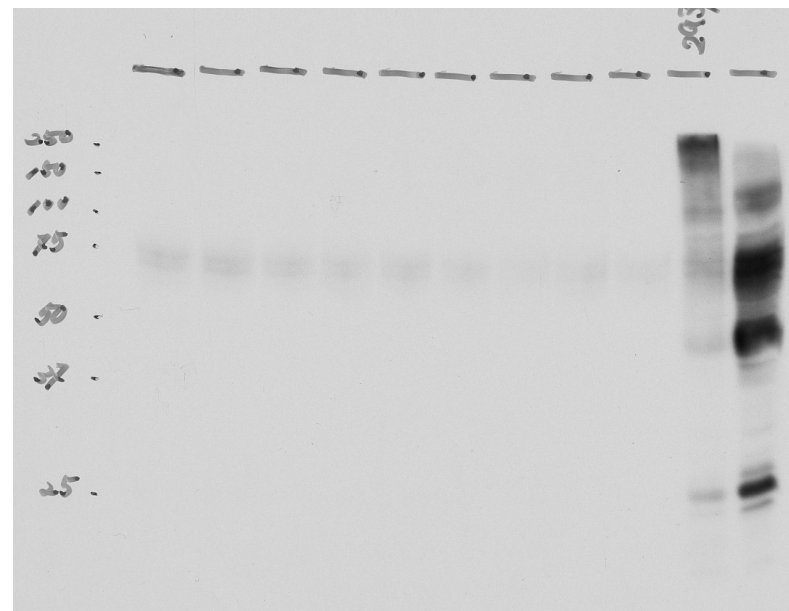

Fig. 4A

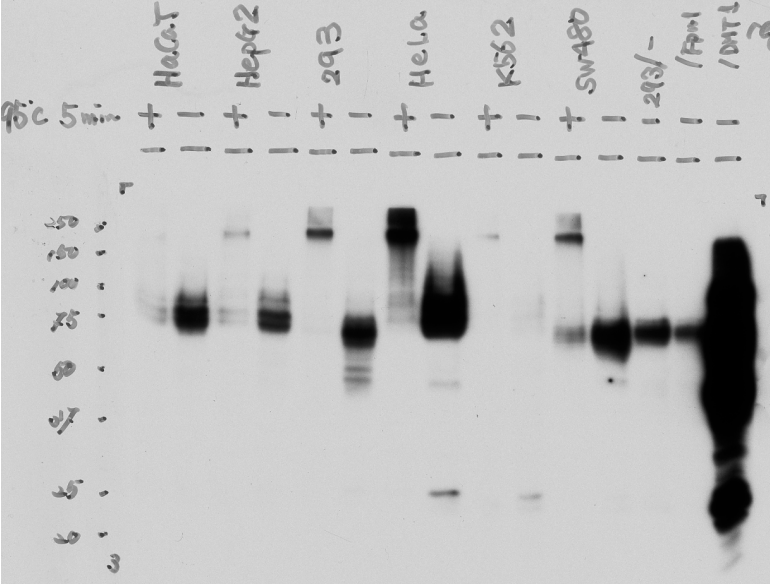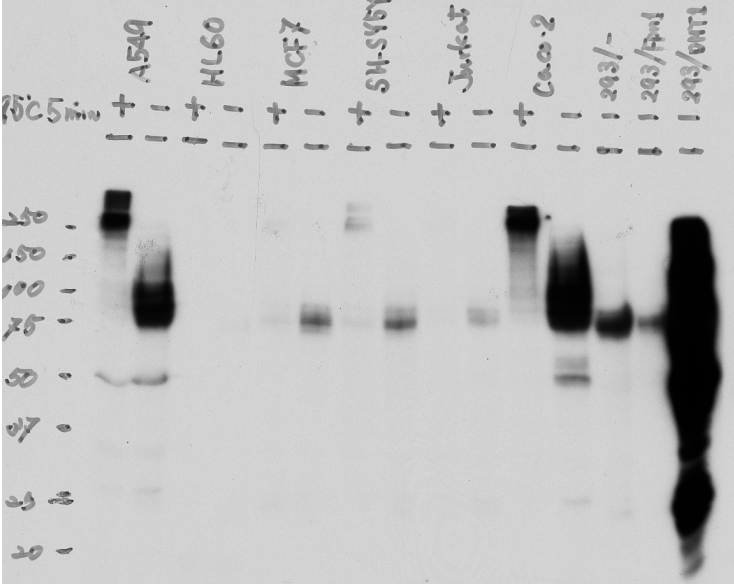

Fig. 4B

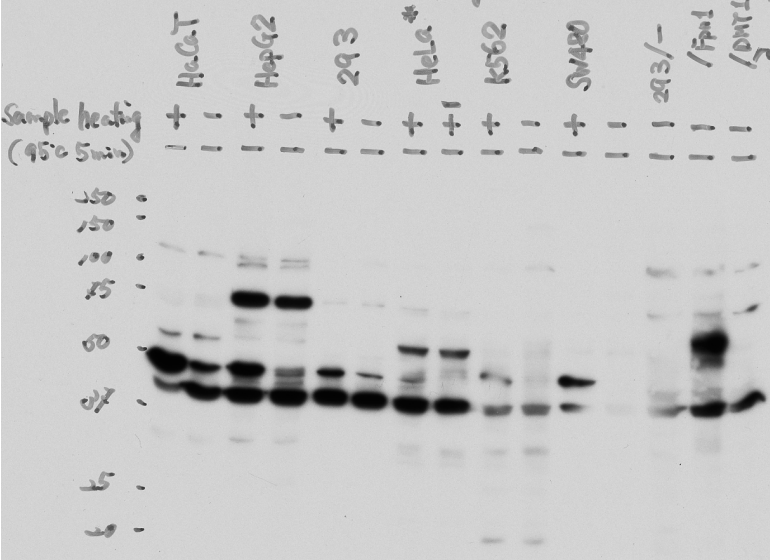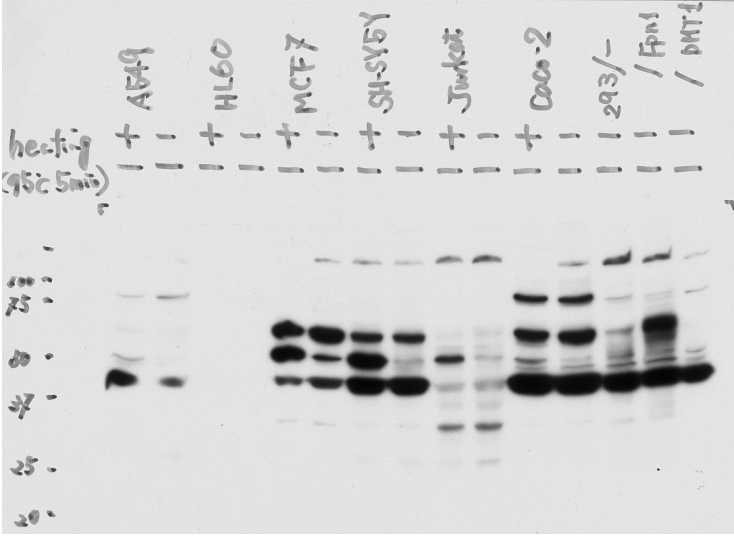

Fig. 5A

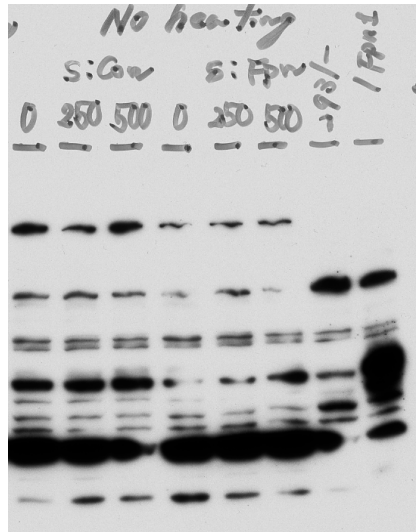

Fig. 5B

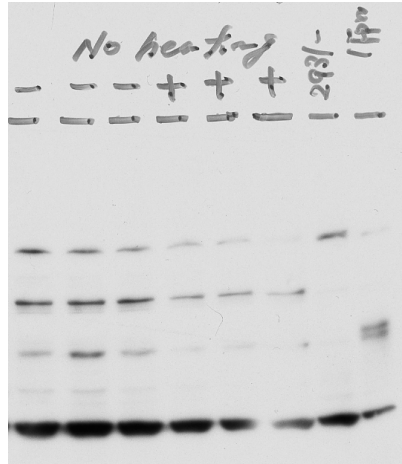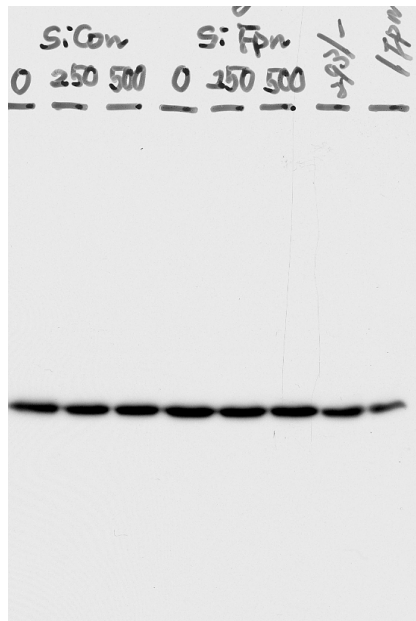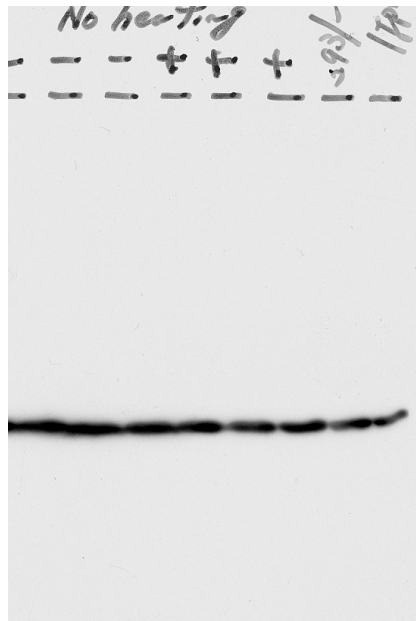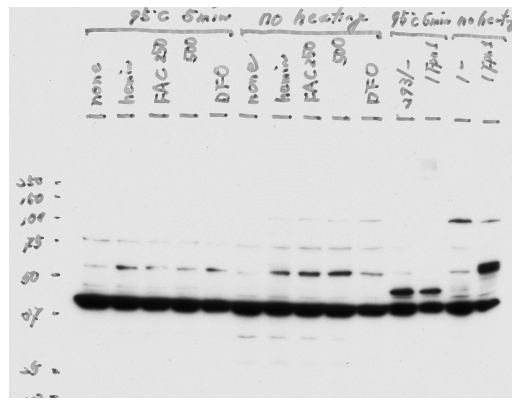

Fig. 6A

Fig. 6B

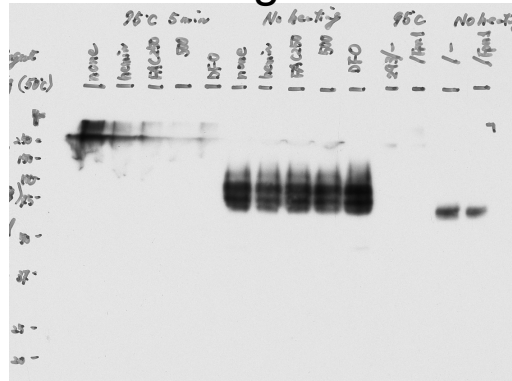

Fig. 6D

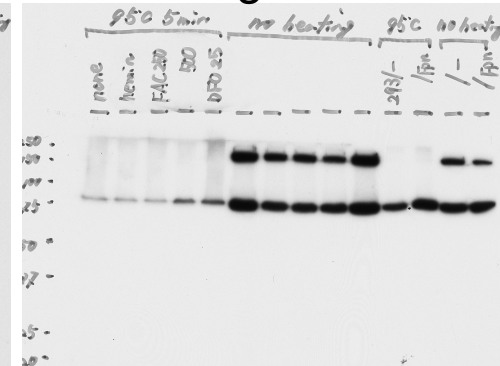

Fig. 6C

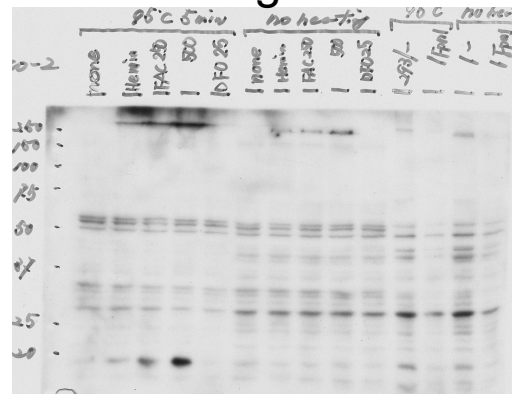

Fig. 6E

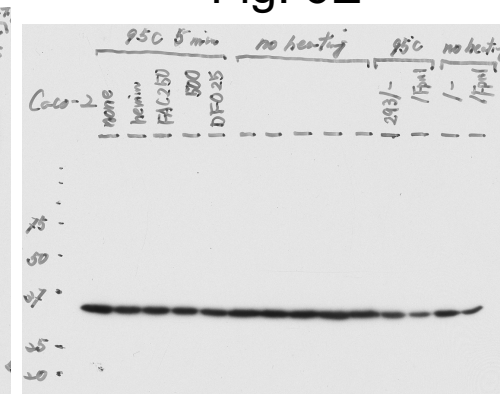



Fig. S1

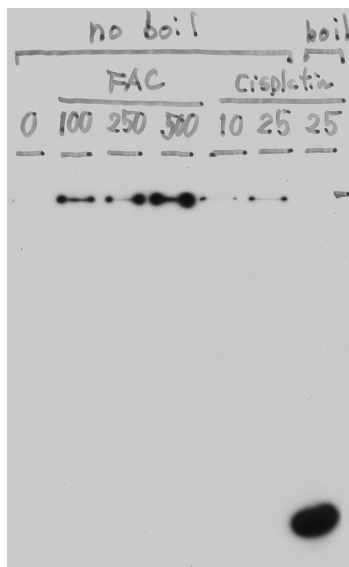

Fig. S2A

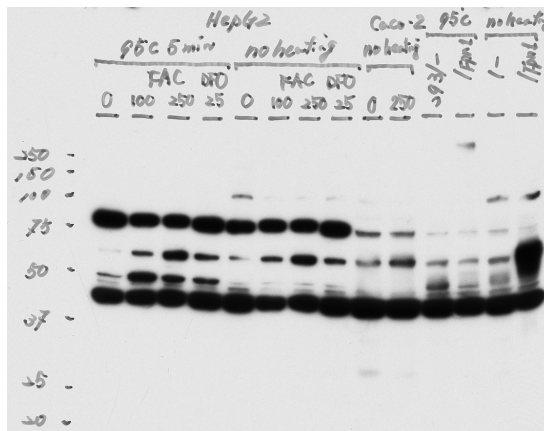

Fig. S2B

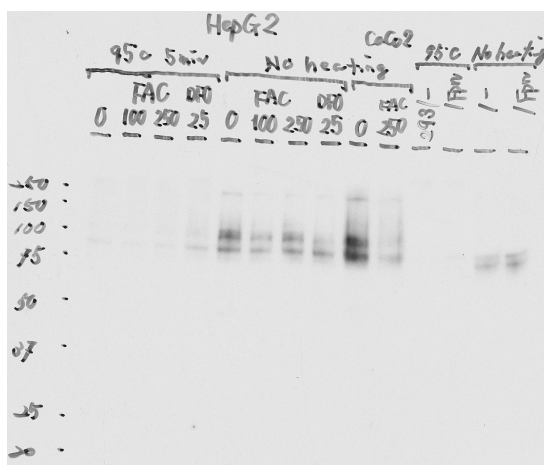

Fig. S2C

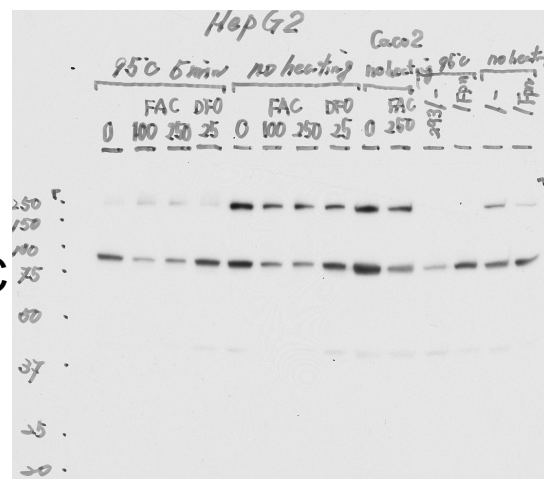

Fig. S2D

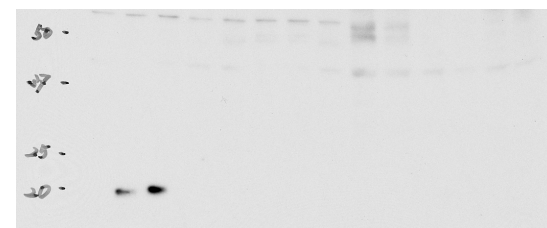

Fig. S2E

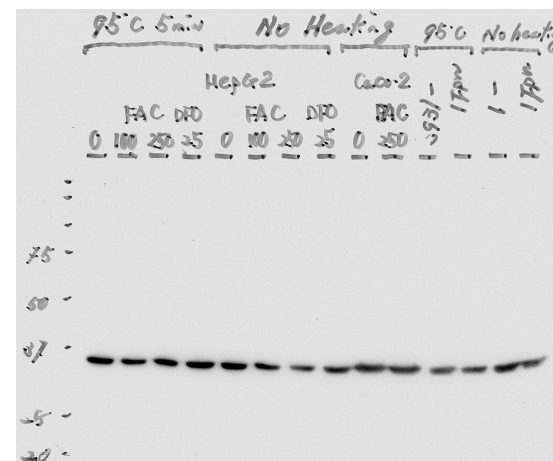

Supplement: pone.0235563.s003.pdf [file pone.0235563.s003.pdf]
